# Supplementary material for: Natural-gel derived, N-doped, ordered and interconnected 1D nanocarbon threads as efficient supercapacitor electrode materials
Source: Royal Society of Chemistry journal article supplement (doi:10.1039/c5ra05107j), 2015-01-01
Supplement: c5ra05107j1.pdf [file c5ra05107j1.pdf]

---

## Supplementary Information

# Natural-Gel Derived, N-doped, Ordered and Interconnected 1D Nanocarbon Threads As Efficient Supercapacitor Electrode Material

---

Malik Wahid<sup>ab\*</sup>, Golu Parte<sup>ab</sup>, Rohan Fernandes<sup>c</sup>, Dushyant Kothari<sup>c</sup> and Satishchandra Ogale<sup>ab\*</sup>

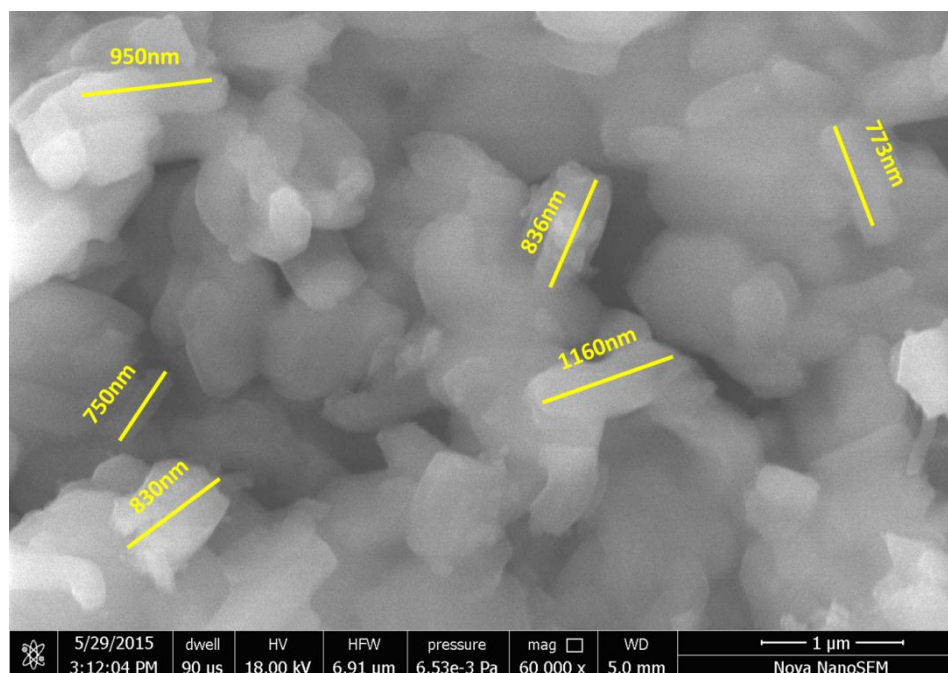

**Fig. S1** FE-SEM image of SBA-15 particles

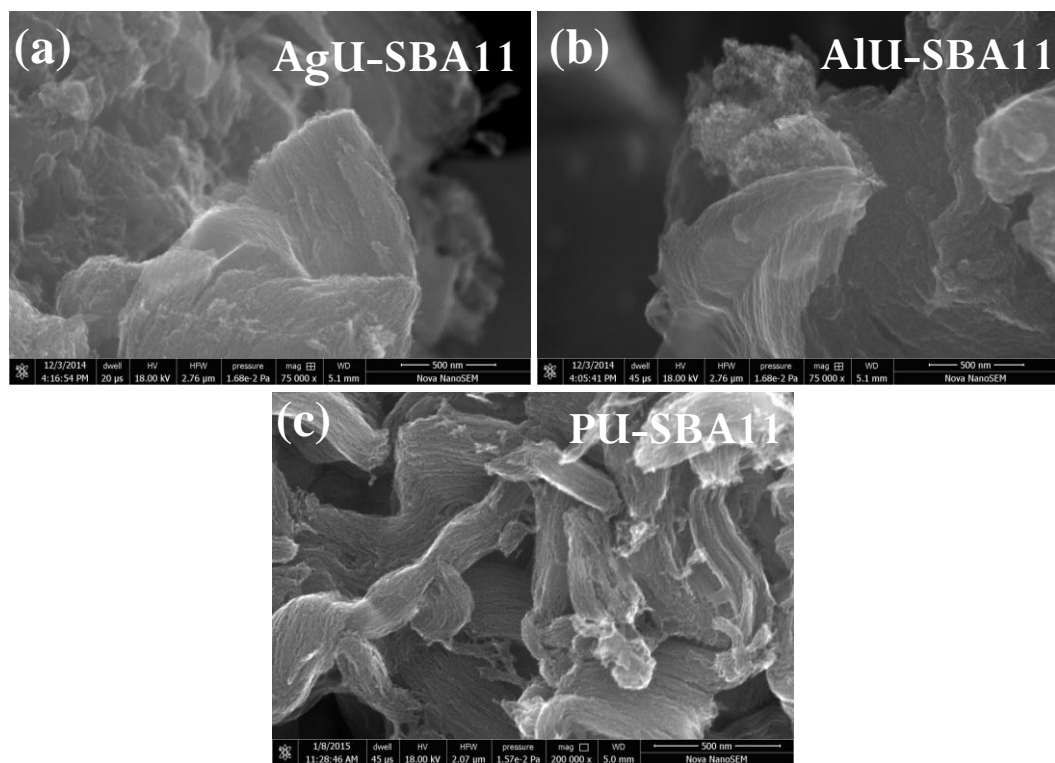

**Fig. S2** FE-SEM images of three natural gels: **a)** Agarose -Urea gel, **b)** Na-Alginate-Urea gel, **c)** Pectin-Urea gel.

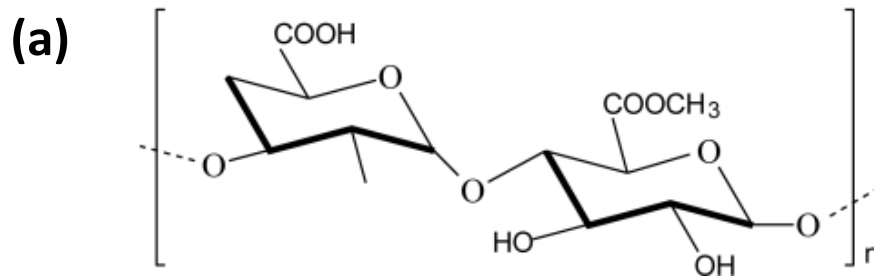

Pectin is a polymer of modified sugar, galacturonic acid and in the plant the its carboxyl groups are esterified with methyl (CH<sub>3</sub>) groups which are not shown in the picture

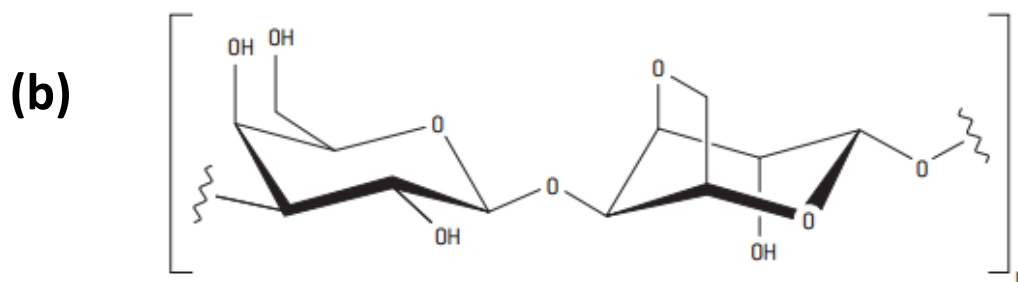

Agarose is a polysaccharide consisting of 1,3-linked  $\beta$ -D-galactopyranose and 1,4-linked 3,6-anhydro- $\alpha$ -L-galactopyranose.

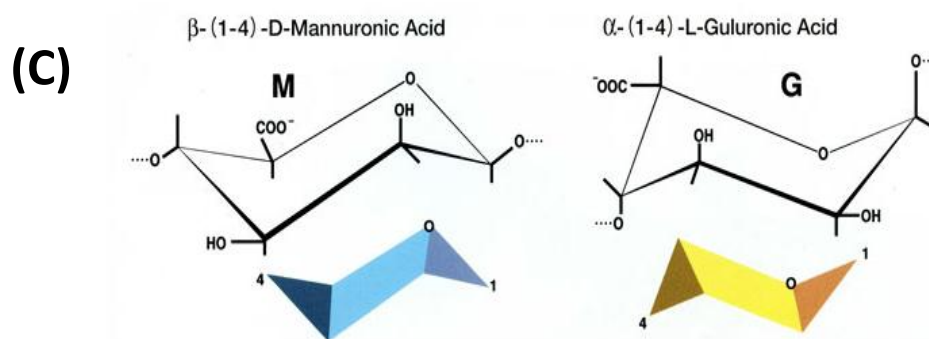

Alginic acid, a polysaccharide is composed of two types of Uronic acid.

**Fig. S3** Shows the chemical structure of the three natural gel, **a**) Pectin {courtesy: [http://openi.nlm.nih.gov/detailedresult.php?img=2866488\\_marinedrugs-08-01305f4&req=4](http://openi.nlm.nih.gov/detailedresult.php?img=2866488_marinedrugs-08-01305f4&req=4)}

**b**) Agarose {courtesy: [http://bio.lonza.com/uploads/tx\\_mwaxmarketingmaterial/Lonza\\_BenchGuides\\_SourceBook\\_Appendix\\_B\\_-\\_Agarose\\_Physical\\_Chemistry.pdf](http://bio.lonza.com/uploads/tx_mwaxmarketingmaterial/Lonza_BenchGuides_SourceBook_Appendix_B_-_Agarose_Physical_Chemistry.pdf)}

**c**) Alginate {courtesy: [http://www.kimica-alginate.com/alginate/chemical\\_structure.html](http://www.kimica-alginate.com/alginate/chemical_structure.html)}

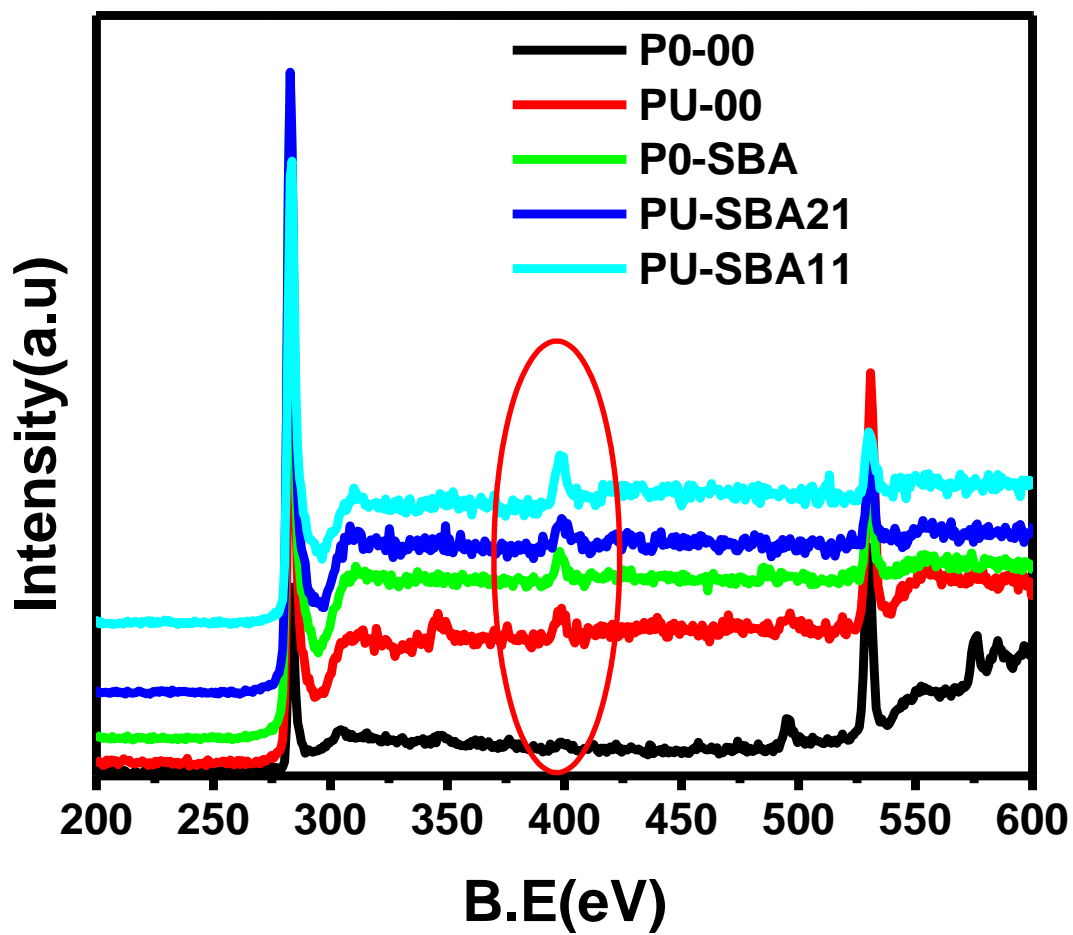

Fig. S4 Comparative Survey XPS spectra all pectin derived samples.

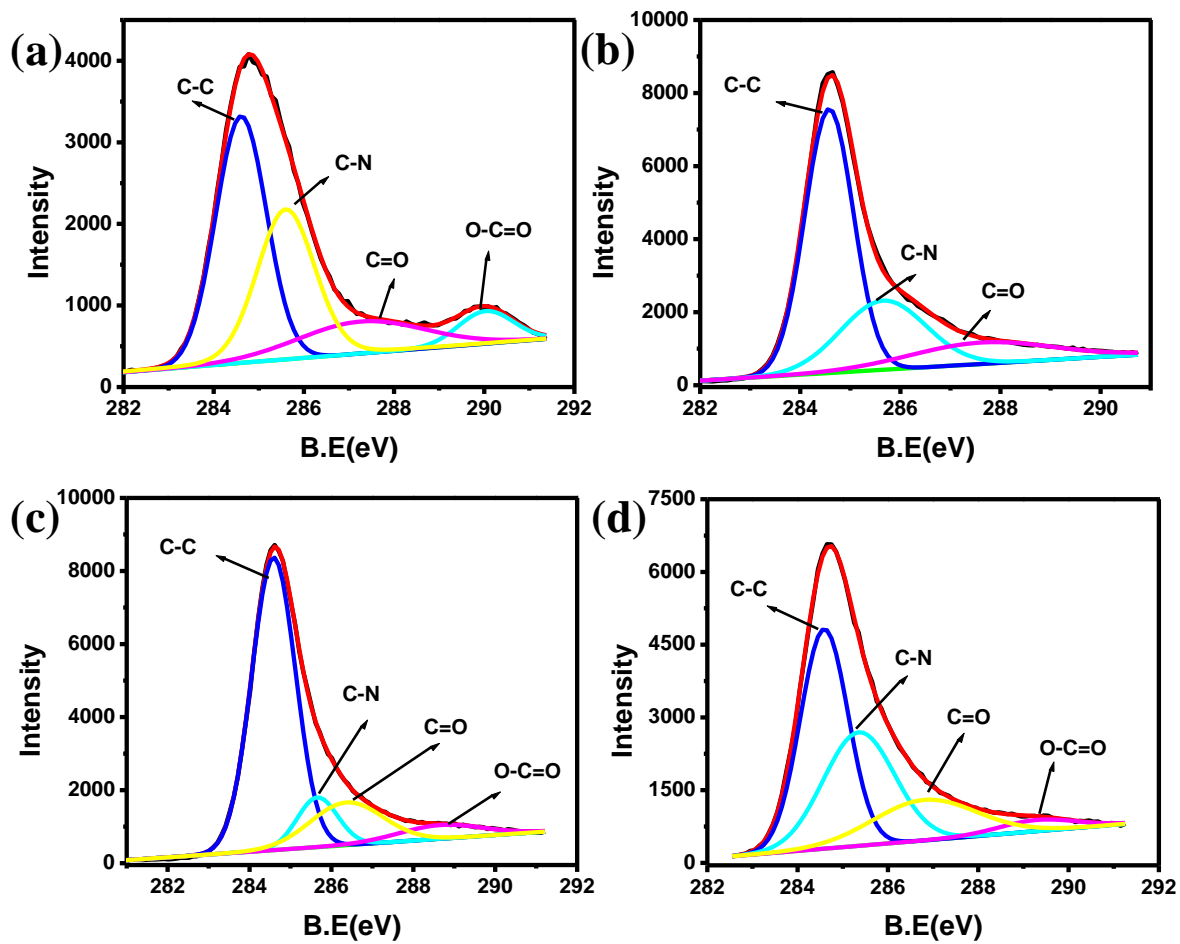

**Fig. S5** Deconvoluted Carbon 1S spectra of all pectin derived carbons.

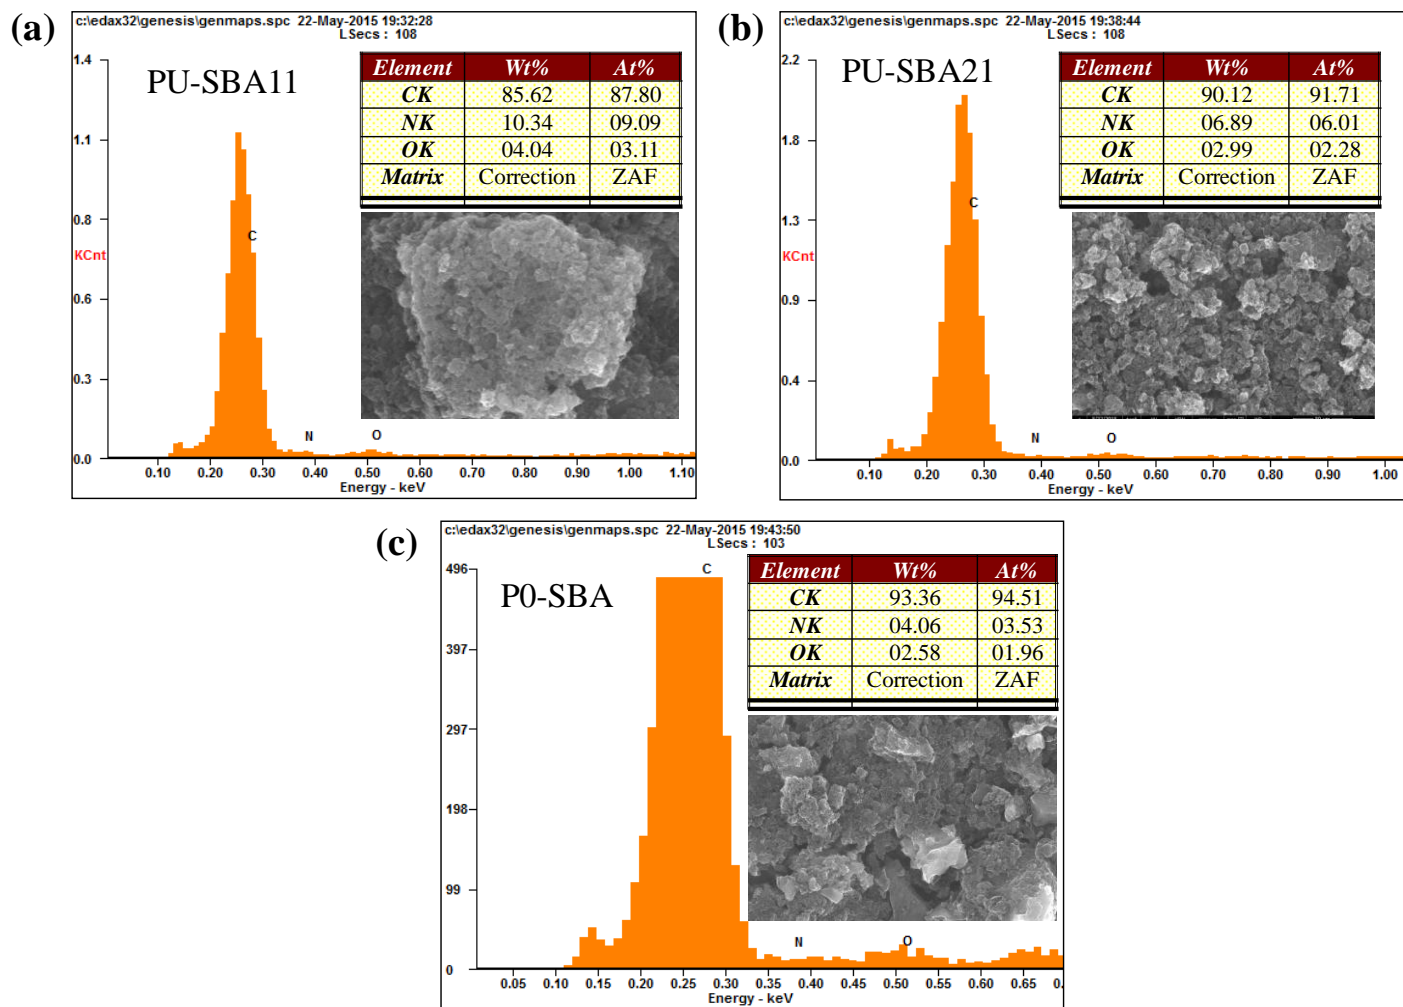

**Fig. S6** EDS spectra of three pectin derived carbon forms along with the atomic percentage of C, O, and N . a) PUSBA11, b) PUSBA21, c) P0-SBA

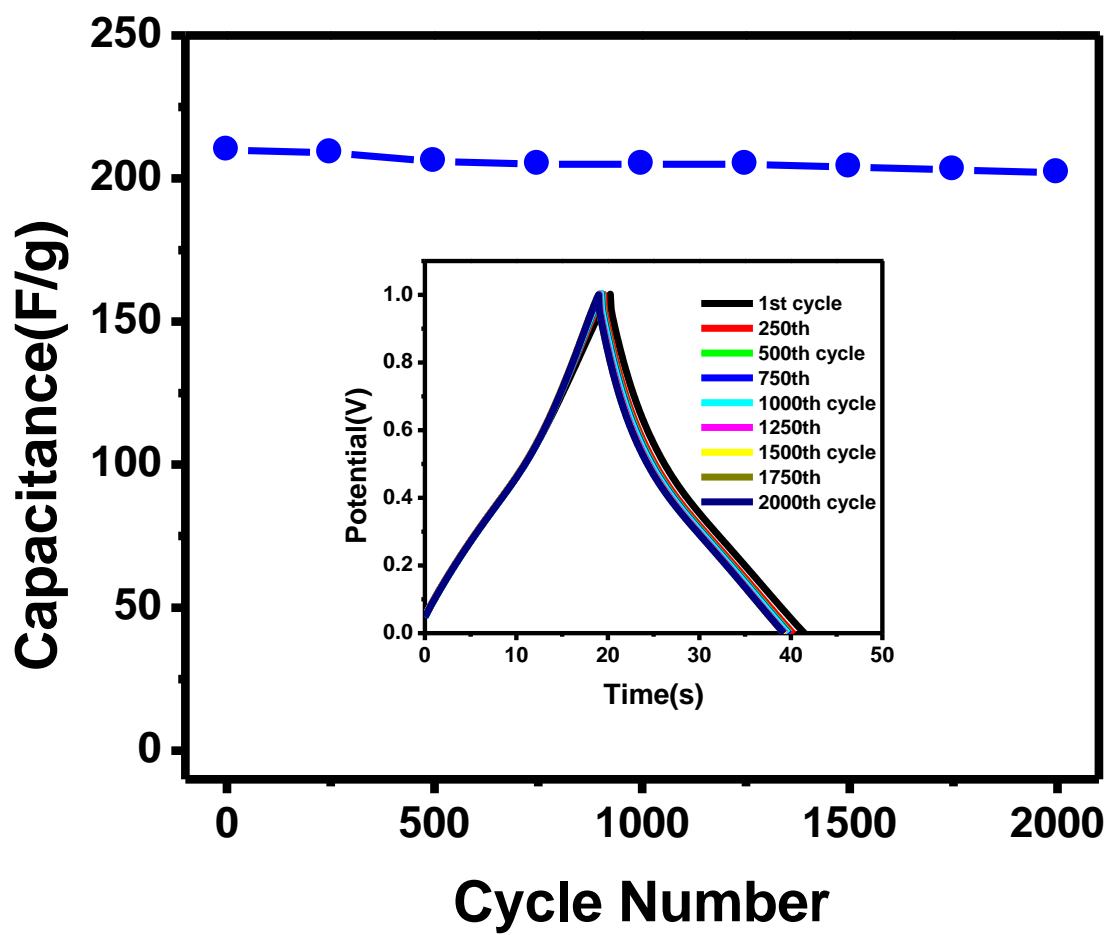

**Fig. S7** Shows the cyclic stability measurements of PU-SBA11 at current density of 10A/g in a three electrode cell using 1M $H_2SO_4$  as electrolyte vs calomel reference electrode.

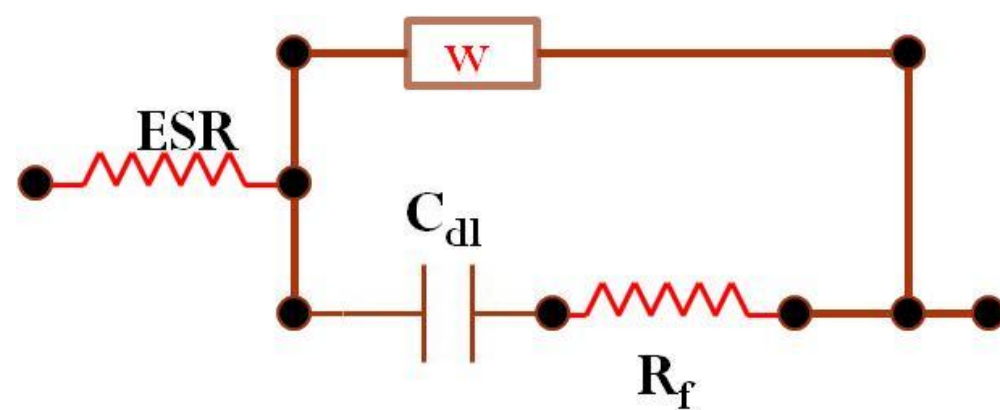

**Fig. S8** Equivalent circuit used to fit the impedance data of all the synthesized carbon materials. Circuit is characterized by presence of a Warberg impedance element **W** in parallel to double layer capacitance, and a element of resistance **R<sub>f</sub>** in series with double layer capacitance **C<sub>dl</sub>**, connected to an external resistance **ESR** .



**Table. T1** Summarizes the electrochemical performance of all different gel derived carbons

| <b>Samples</b>   | <b>Capacitance (F/g)</b><br>(charge discharge) |              | <b>Impedance Analysis</b>       |                                              |                                              |                 |
|------------------|------------------------------------------------|--------------|---------------------------------|----------------------------------------------|----------------------------------------------|-----------------|
|                  | <b>1A/g</b>                                    | <b>10A/g</b> | <b>ESR(<math>\Omega</math>)</b> | <b><math>C_{dl}</math>(F/cm<sup>2</sup>)</b> | <b><math>R_f</math>(<math>\Omega</math>)</b> | <b>W (mMho)</b> |
| <b>P0-00</b>     | <b>20</b>                                      | <b>12</b>    | <b>2.97</b>                     | <b>11</b>                                    | <b>0.454</b>                                 | <b>12</b>       |
| <b>PU-00</b>     | <b>60</b>                                      | <b>55</b>    | <b>2.57</b>                     | <b>42</b>                                    | <b>0.624</b>                                 | <b>13</b>       |
| <b>P0-SBA</b>    | <b>226</b>                                     | <b>160</b>   | <b>2.26</b>                     | <b>104</b>                                   | <b>0.362</b>                                 | <b>49</b>       |
| <b>PU-SBA21</b>  | <b>240</b>                                     | <b>180</b>   | <b>2.07</b>                     | <b>154</b>                                   | <b>0.389</b>                                 | <b>17</b>       |
| <b>PU-SBA11</b>  | <b>285</b>                                     | <b>210</b>   | <b>1.61</b>                     | <b>207</b>                                   | <b>0.142</b>                                 | <b>15</b>       |
| <b>AgU-SBA11</b> | <b>10</b>                                      | <b>100</b>   | <b>2.9</b>                      | <b>89</b>                                    | <b>0.628</b>                                 | <b>60</b>       |
| <b>AIU-SBA11</b> | <b>110</b>                                     | <b>160</b>   | <b>2.5</b>                      | <b>112</b>                                   | <b>0.350</b>                                 | <b>85</b>       |

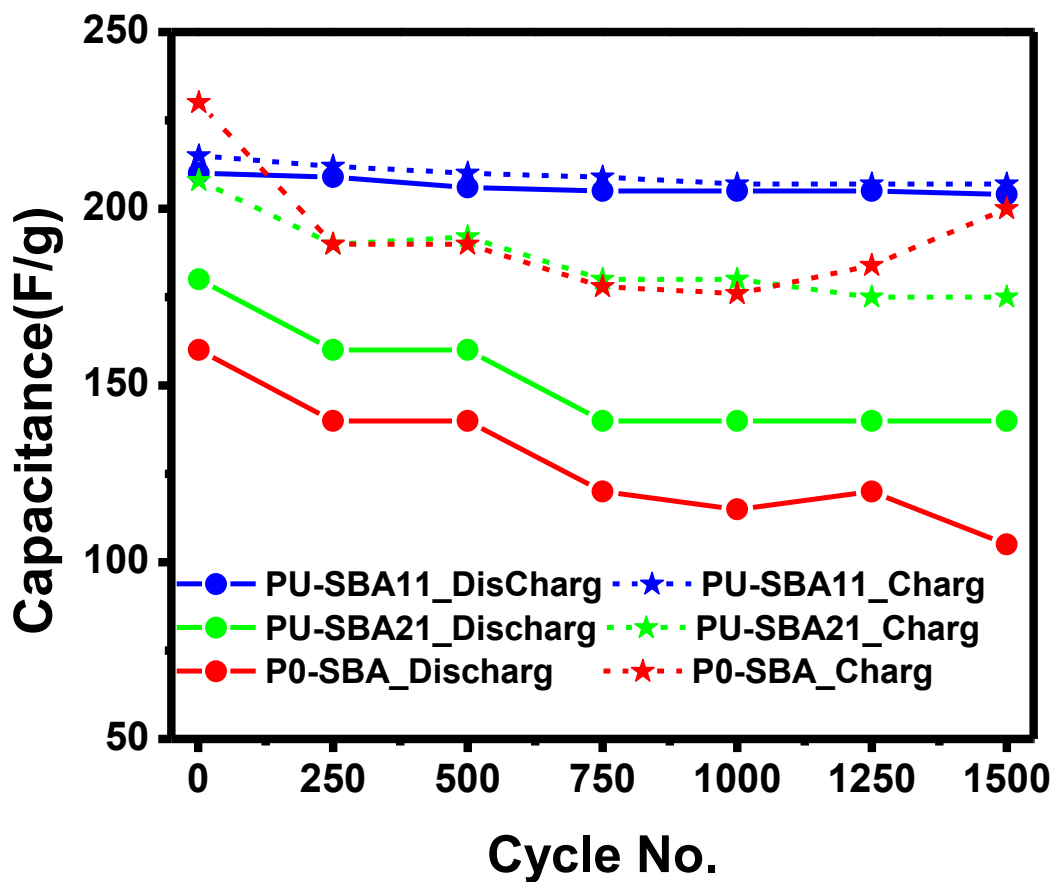

**Fig. S9** Shows the cyclic stability data of PU-SBA11, PU-SBA21, and P0-SBA at Current density of 10A/g in a three electrode cell using 1M $H_2SO_4$  as electrolyte vs calomel reference electrode up to 1500 charge discharge cycles.
